# Supplementary material
Source: Springer Nature journal article supplement (https://www.springermedizin.de/resource/supplementary/12916_2008_180_MOESM7_ESM.pdf/9599382)

Favors other drugs      Favors long-acting beta-agonists

**FEV<sub>1</sub> > 40% predicted**

**Odds ratio (95% CI)**

Long-acting anticholinergic

0.92 (0.74-1.15)

Inhaled corticosteroid

1.10 (0.97-1.25)

Long-acting bronchodilator +  
inhaled corticosteroid

1.05 (0.91-1.21)

**FEV<sub>1</sub> ≤ 40% predicted**

Long-acting anticholinergic

0.83 (0.71-0.98)

Inhaled corticosteroid

0.75 (0.57-1.00)

Long-acting bronchodilator +  
inhaled corticosteroid

0.79 (0.67-0.93)

**All patients**

Long-acting anticholinergic

0.91 (0.81-1.03)

Inhaled corticosteroid

1.00 (0.90-1.13)

Long-acting bronchodilator +  
inhaled corticosteroid

0.93 (0.84-1.04)

.5      .75      1      1.33      2

Odds ratio

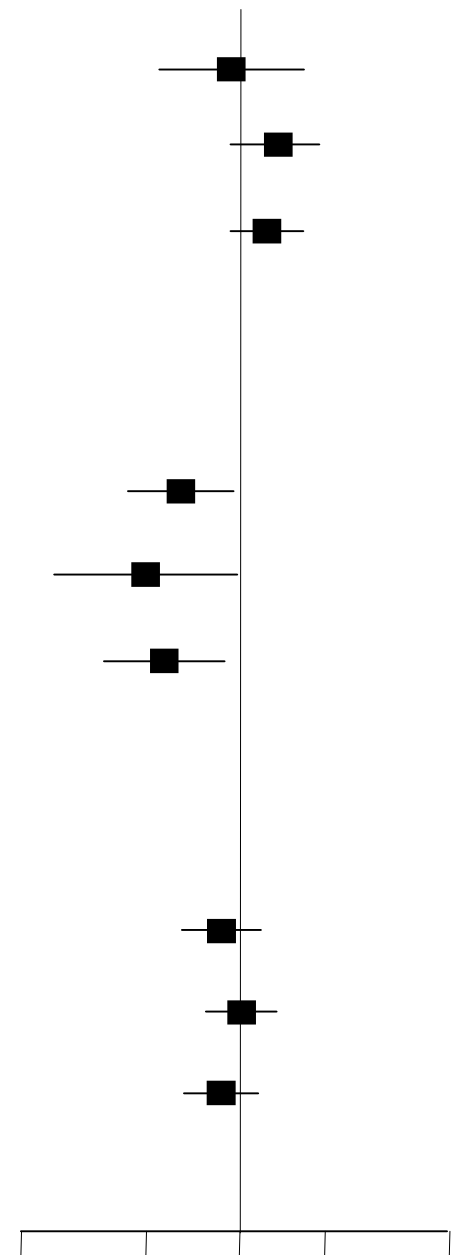

Supplement: MOESM7 [file 9599382]
